# Supplementary material for: Community Partnership in Response to Hoarding Disorder in Montreal
Source: Atypon-hosted journal article supplement (doi:10.1176/appi.ps.201900485), 2020-03-02
Supplement: appi.ps.201900485.ds001.pdf [file appi.ps.201900485.ds001.pdf]

## Online supplement

### Media-covering of the First Quebec Colloquium on Hoarding Disorder

- [TVA Nouvelles Salut/Bonjour \(French\)](#) (French, video)
- [TVA Nouvelles: Quand tout ramasser devient une vraie maladie](#) (French, video)
- [Journal de Montréal : Quand tout ramasser devient une vraie maladie](#) (French, video)
- [Souffrez vous de trouble d'accumulation compulsive?](#) (French, radio)
- [Le premier colloque sur le trouble d'accumulation compulsive se tient jeudi à Montréal](#) (French, newspaper)
- [L'enfer du trouble d'accumulation compulsive-](#) (French, online news)
- [Montreal therapists, citizens raise awareness of compulsive hoarding](#) (English, online news, Montreal)
- [Montreal therapists, citizens raise awareness of compulsive hoarding](#) (English, online news, Toronto)
- [Montreal therapists, citizens raise awareness of compulsive hoarding](#) (English, newspaper)
- [Montréal accueillera un premier colloque québécois sur l'accumulation compulsive :](#) (French, newspaper)
